# Supplementary figures and images for: Untargeted Metabolomic Plasma Profiling of Emirati Dialysis Patients with Diabetes versus Non-Diabetic: A Pilot Study
Source: MDPI journal article supplement (doi:10.3390/biom12070962), 2022-07-08

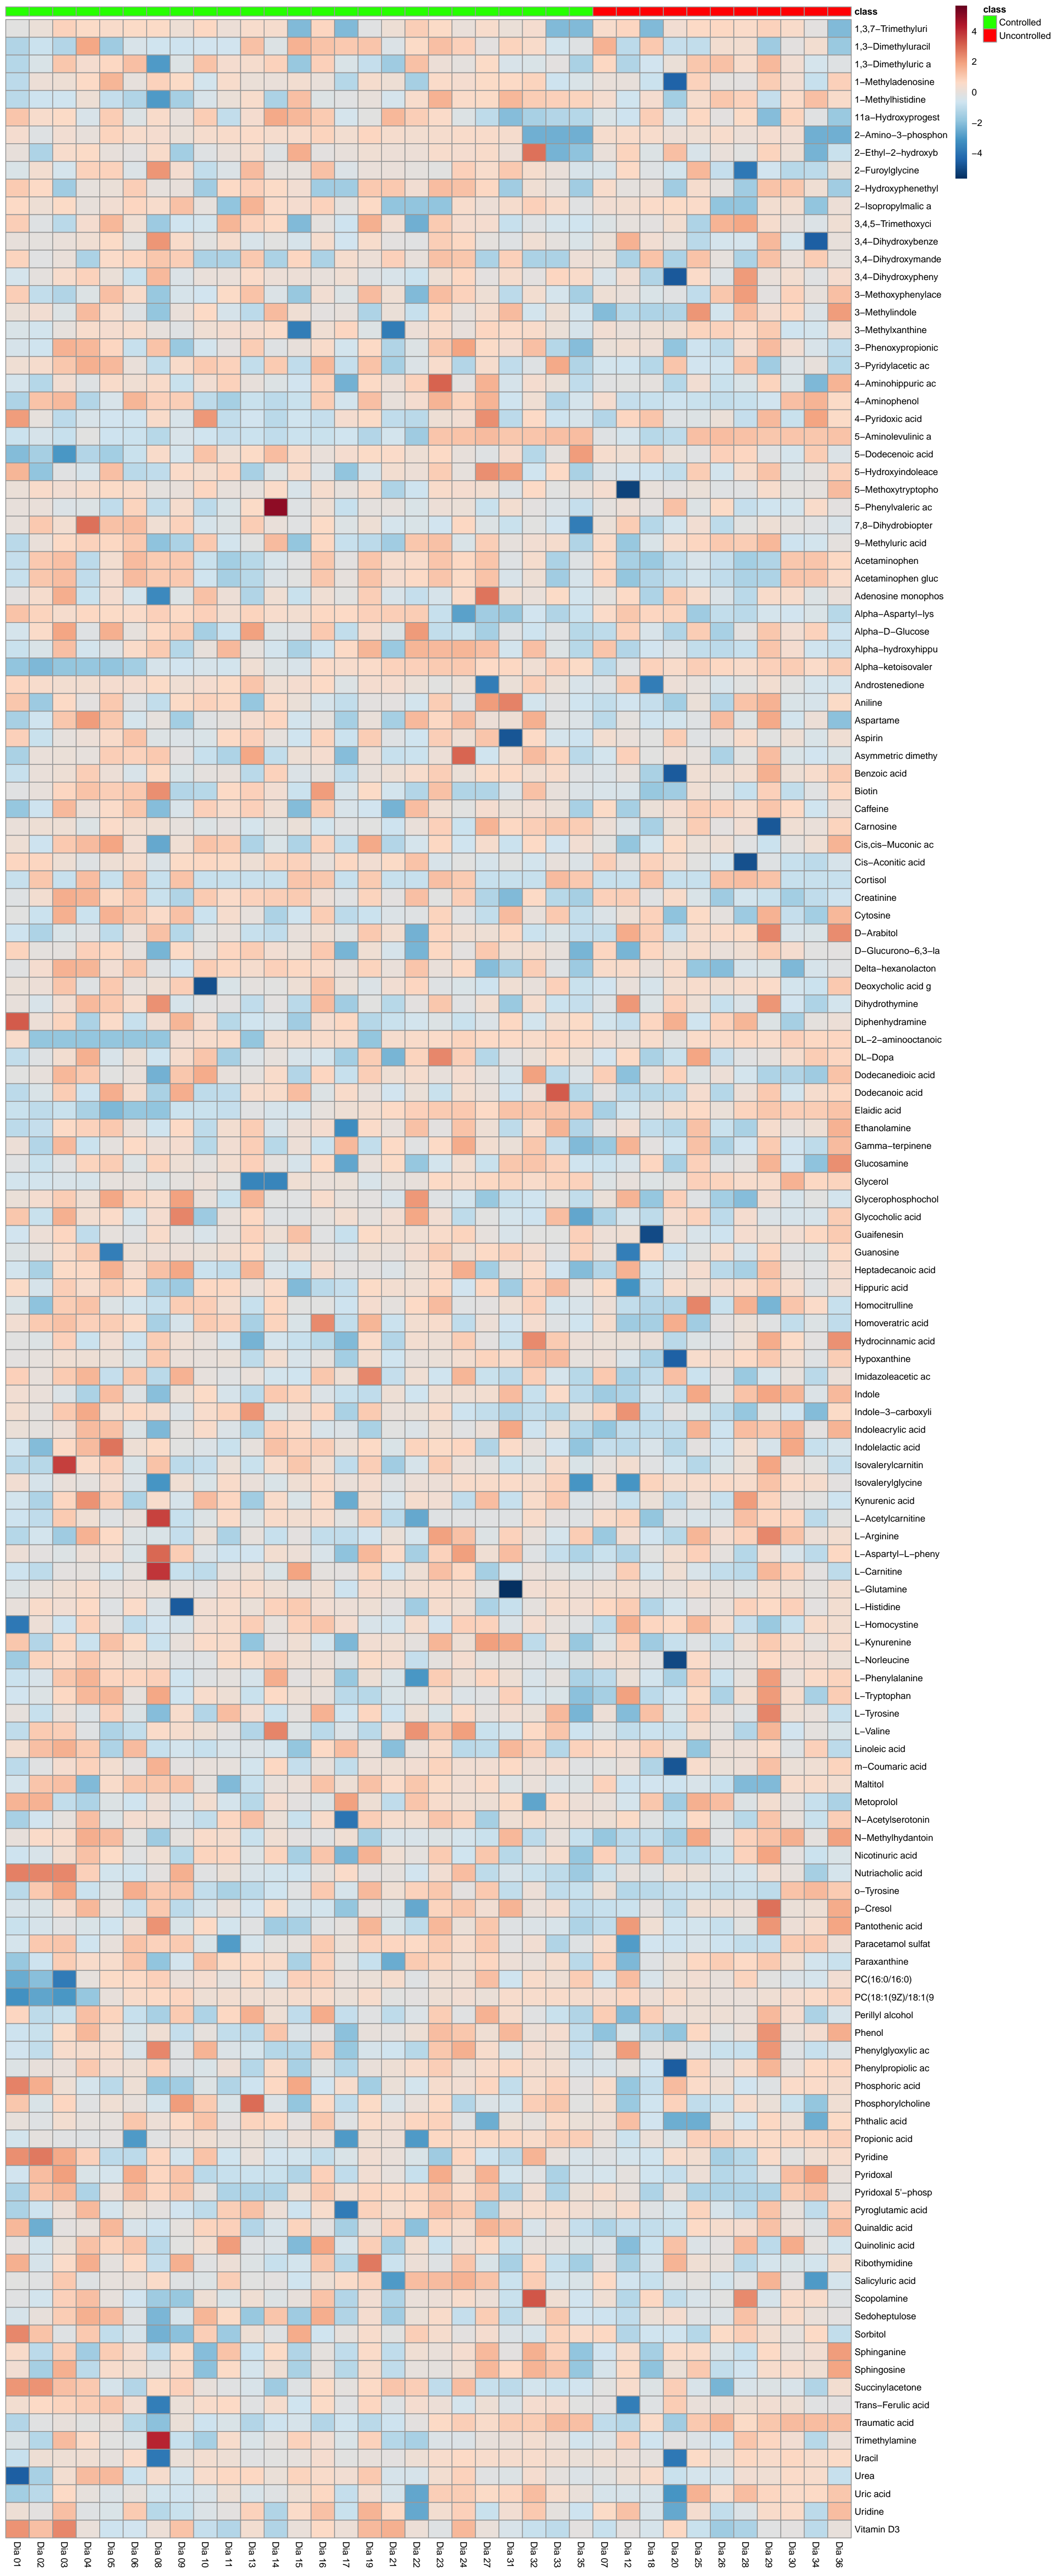

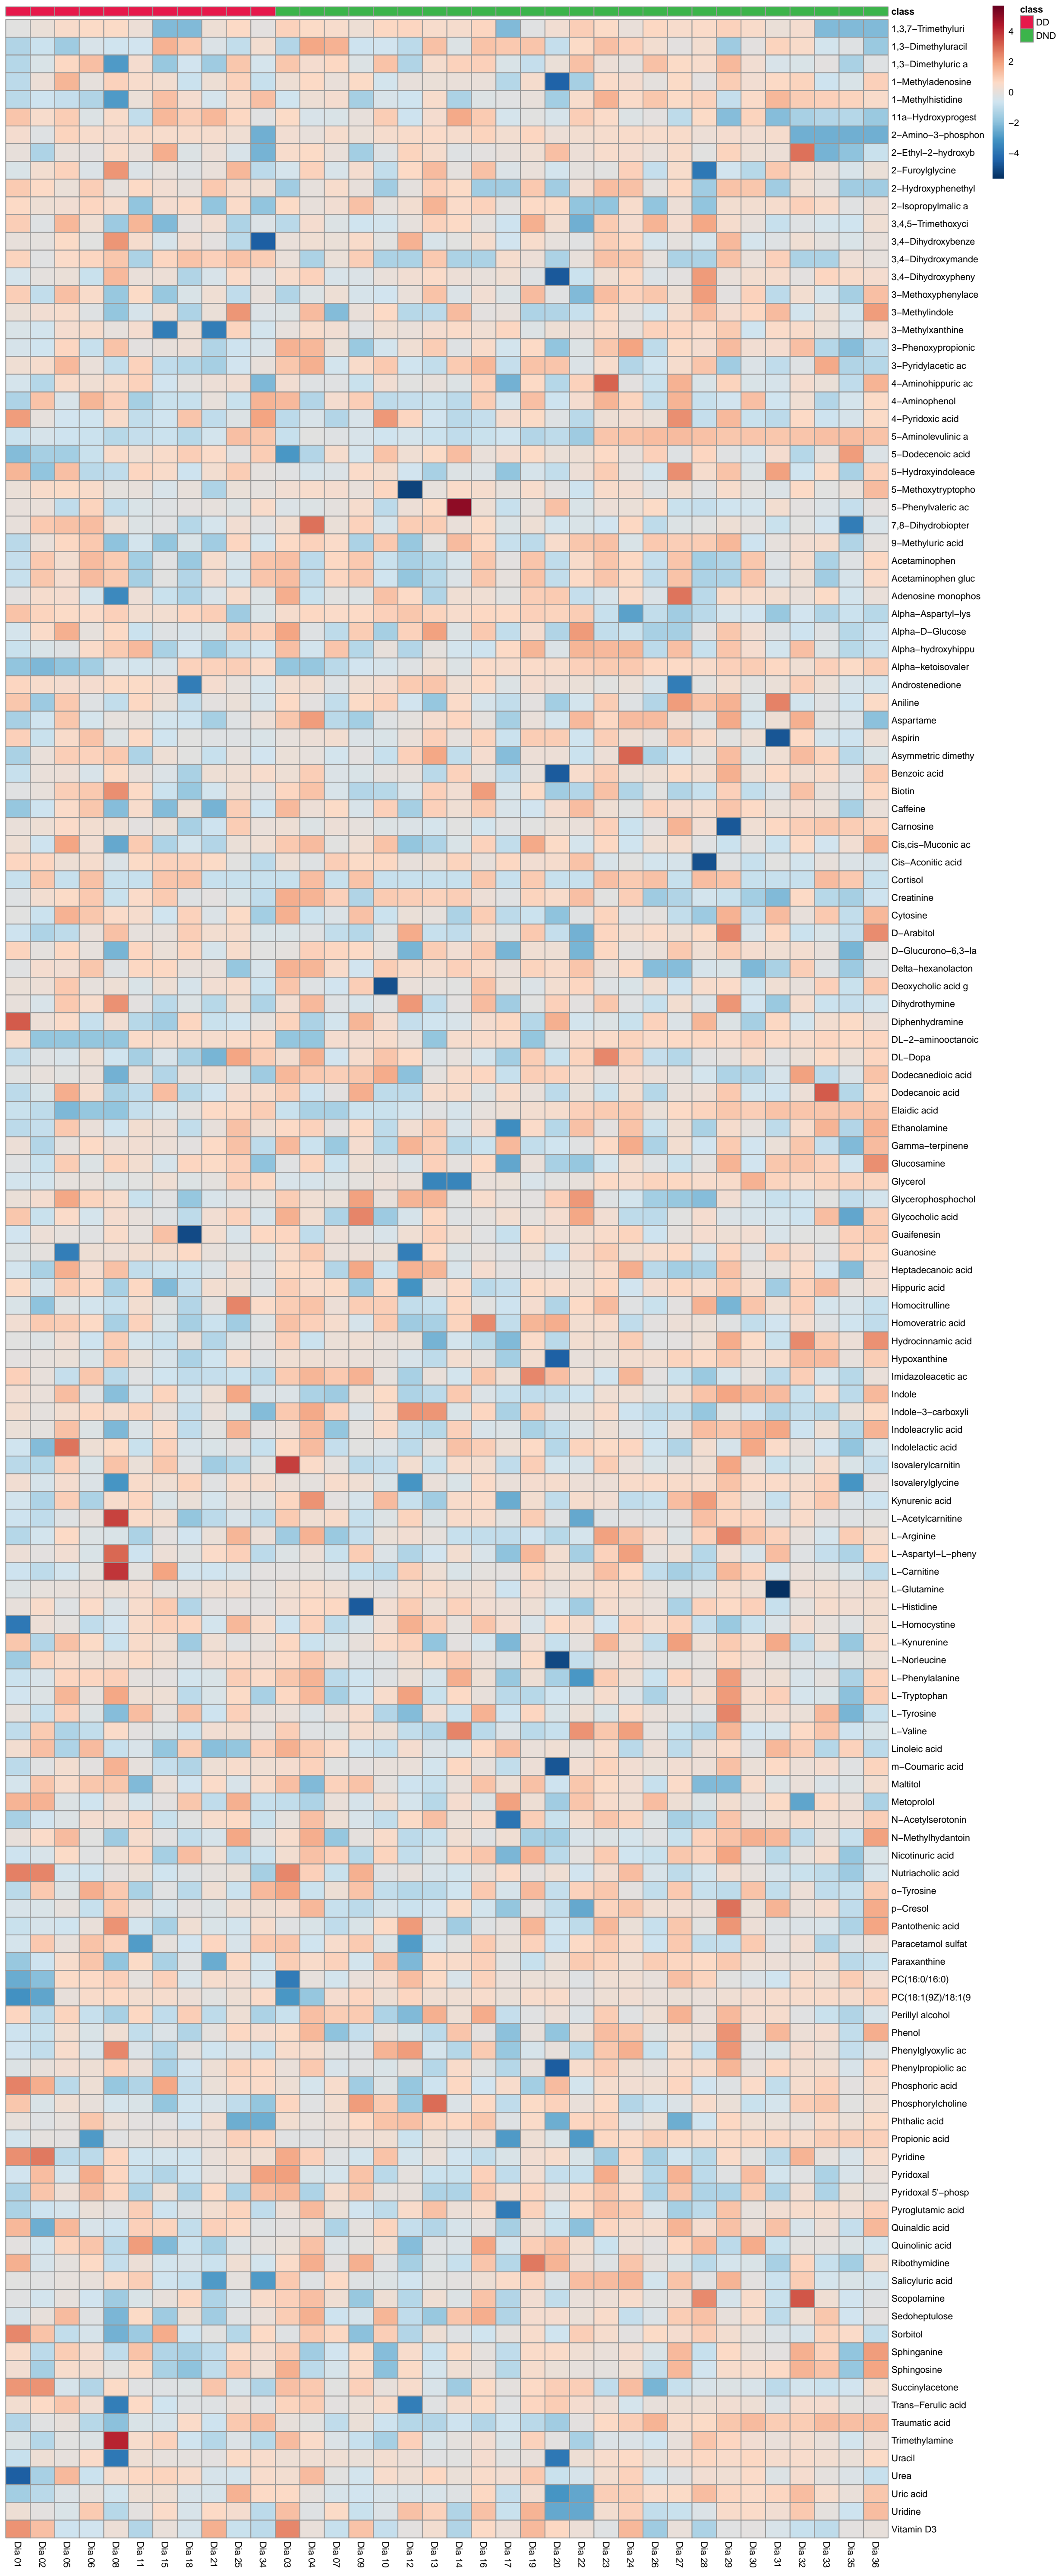

Supplement: s1 [file s1]
